## **Household antibiotic use in Malawi: a cross-sectional survey from urban and peri-urban Blantyre**

Eleanor E MacPherson<sup>1,2</sup>, John Mankhomwa<sup>1</sup>, Justin Dixon<sup>3</sup>, Raymond Pongolani<sup>1</sup>, Mackwellings Phiri<sup>1</sup>, Nicholas Feasey<sup>1,2</sup>, Thomasena O'Byrne<sup>1,2</sup>, Rachel Tolhurst<sup>2</sup>, Peter MacPherson<sup>1,2,3,4</sup>

### Affiliations

1. Malawi-Liverpool-Wellcome Programme, Malawi
2. Liverpool School of Tropical Medicine, UK
3. London School of Hygiene & Tropical Medicine, UK
4. University of Glasgow UK

**NOTE: This preprint reports new research that has not been certified by peer review and should not be used to guide clinical practice.**

## 1 Abstract

## 2 Background

3 Antimicrobial resistance (AMR) is a significant threat to public health. Use of antibiotics,  
4 particularly in contexts where weaker regulatory frameworks make informal access easier,  
5 has been identified as an important driver of AMR. However, knowledge is limited about the  
6 ways antibiotics are used in communities in sub-Saharan Africa.

## 7 Methods

8 Between April and July 2021, we undertook a cross-sectional survey of community antibiotic  
9 use practices in Blantyre, Malawi. We selected two densely-populated neighbourhoods  
10 (Chilomoni and Ndirande) and one peri-urban neighbourhood (Chileka) and undertook  
11 detailed interviews to assess current and recent antibiotic use, supported by the innovative  
12 “drug bag” methodology. Regression modelling investigated associations with patterns of  
13 antibiotic recognition.

## 14 Results

15 We interviewed 217 households with a total of 1051 household members. The number of  
16 antibiotics recognised was significantly lower among people with poorer formal health care  
17 access (people with unknown HIV status vs. HIV-negative, adjusted odds ratio [aOR]: 0.76,  
18 95% CI: 0.77-.099) and amongst men (aOR: 0.83, 95% CI: 0.69-0.99), who are less likely to  
19 support healthcare-seeking for family members. Reported antibiotic use was mostly limited  
20 to a small number of antibiotics (amoxicillin, erythromycin and cotrimoxazole), with current  
21 antibiotic use reported by 67/1051 (6.4%) and recent use (last 6 months) by 440/1051  
22 (41.9%).

## 23 Conclusions

24 Our findings support the need for improved access to quality healthcare in urban and peri-  
25 urban African settings to promote appropriate antibiotic use and limit the development and  
26 spread of AMR.

27

## 28 Introduction

29 Drug resistant infections are increasing worldwide and there is global consensus on the  
30 need for urgent action to address antimicrobial resistance (AMR).<sup>1</sup> Optimising the use of  
31 antibiotics is one of the central pillars of the WHO global action plan to address AMR.<sup>2</sup> The  
32 ramifications of AMR are being more acutely felt in low-and-middle-income countries  
33 (LMICs), where there is a higher burden of infectious diseases and health systems are  
34 weaker.<sup>3</sup> In low-income contexts where routine diagnostic microbiology facilities are scarce,  
35 data on the epidemiology and burden of AMR is limited.<sup>4-6</sup>

36

37 In the past two decades, academic and policy research has shown a substantially increased  
38 use of antibiotics in LMICs.<sup>7,8</sup> Due to contextual factors including weaker regulatory  
39 frameworks and more fragile health systems, antibiotics are often bought over-the-counter,  
40 or obtained through informal networks.<sup>9-11</sup> However, research conducted in LMICs has  
41 demonstrated that antibiotic use practices, including self-medication, are heterogeneous.<sup>12-</sup>  
42 <sup>14</sup> Do and colleagues (2021) undertook a survey in six countries in Asia and Africa, and found  
43 substantial differences in self-medication of antibiotics, with rates lower in Mozambique  
44 (8.0%) and South Africa (1.2%) than in Bangladesh (45.7%) and Ghana (36.1%).<sup>14</sup> Torres and  
45 colleagues (2020) did a systematic scoping review of self-medication with antibiotics in 10  
46 low- and middle-income countries, and found a prevalence of self-medication in the  
47 preceding year that ranged from 8.1% to 93% across countries.<sup>13</sup> Both these studies found  
48 that factors shaping self-medication were complex and included access to, and cost and  
49 quality of care at health care facilities.<sup>13,14</sup> The diversity in the prevalence of self-medication  
50 of antibiotics in different countries underscores the need for accurate national data to guide  
51 antibiotic use and AMR policy and practice.

52

53 Global antibiotic consumption assessments have primarily relied on pharmaceutical sales  
54 records, but this data is frequently unavailable or unreliable, especially in the African  
55 region.<sup>15–17</sup> In LMICs, most academic research has been conducted in secondary or tertiary  
56 care facilities. While researchers are increasingly investigating antibiotic use in primary  
57 health care and community contexts,<sup>12,16,18</sup> there remain significant gaps in knowledge on  
58 antibiotic use practices in community settings, with knowledge particularly limited in  
59 countries in Southern and Eastern Africa.<sup>13,14</sup> Given the role reduction in antibiotic use (ABU)  
60 is expected to play in reducing AMR, generating robust ABU surveillance data is a necessary  
61 first step to inform context-specific interventions.<sup>19</sup> This paper aimed to generate data on  
62 current antibiotic use in three residential areas in Blantyre, Malawi.

## 63 **Materials and Methods**

### 64 *Ethics statement*

65 Ethical approval was obtained from the College of Medicine Research Ethics Committee,  
66 Malawi (approval number: P06/182429) and London School of Hygiene and Tropical  
67 Medicine Research Ethics Committee (approval number: 14617). Permission to work in the  
68 study communities was granted by the Blantyre District Health Officer. All participants  
69 provided written informed consent to participate.

### 70 71 *Study Design and Population*

72  
73 Data were collected between April and July 2021. We undertook a cross-sectional survey in  
74 two densely-populated neighbourhoods (Chilomoni and Ndirande) and one peri-urban  
75 neighbourhood (Chileka) in Blantyre, Malawi. Blantyre is a major commercial centre located  
76 in the Southern Region of Malawi. The total population of Blantyre District was estimated to  
77 be approximately 1 million people in the 2018 Malawi National Census<sup>20</sup>, and adult HIV  
78 prevalence is estimated to be 18%<sup>21</sup>. Chilomoni and Ndirande are well-established urban  
79 neighbourhoods, with poor access to municipal services, and high rates of household  
80 poverty. Chileka is located on the periphery of Blantyre and is characterised by a mixture of  
81 recently established peri-urban households and households engaged in subsistence farming.

82

83 Participants eligible to take part in the survey were adults (aged 18 years or older) resident  
84 in households in either Chilomoni, Chileka, or Ndirande. We excluded households where  
85 there was no adult available to complete questionnaires, or where the household head  
86 declined consent to participate.

87

88 The unit of sampling was the household. To establish a household sampling frame for  
89 Chilomoni and Ndirande, we obtained neighbourhood boundaries and used georeferenced  
90 household data from a previous population census of these neighbourhoods conducted as  
91 part of a cluster-randomised trial of TB and HIV interventions in 2015 (Figure 1). Households  
92 were randomly selected within each neighbourhood, with a replacement list for when  
93 households declined participation or were not identified. As Chileka was not part of the  
94 2015 trial census, we selected random sets of GPS coordinates from within the  
95 neighbourhood boundaries.

96

97 **Figure 1: Location of households sampled for interview**

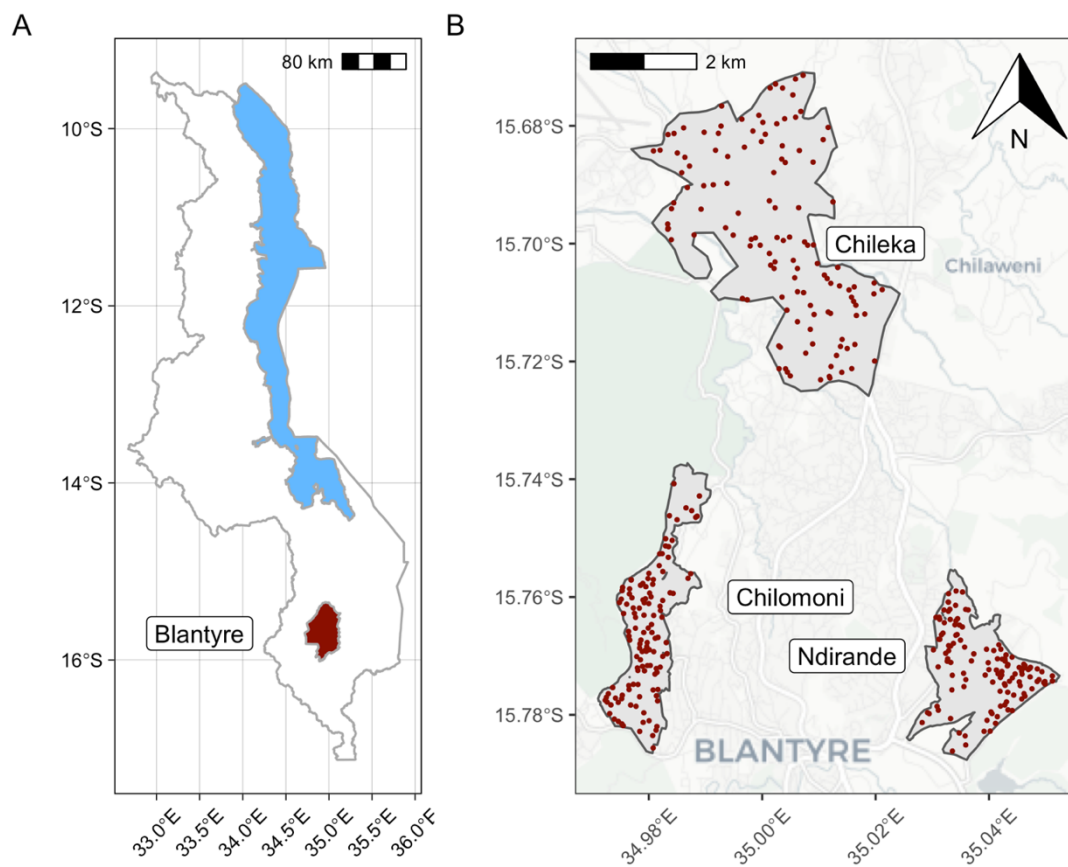

98

## 99    **Procedures**

100    Using GPS coordinates of randomly-selected households in Chilomoni and Ndirande, study  
101    fieldworkers navigated to selected households; in Chileka, they navigated to selected  
102    locations using GPS coordinates, and identified the nearest household to this point. After  
103    identifying the household head and obtaining informed written consent, the fieldworker  
104    administered a questionnaire to record demographic and socio-economic characteristics of  
105    the household and household head. Data were collected using ODK Collect running on study  
106    tablets and uploaded securely in real-time to the Data Server at the London School of  
107    Hygiene and Tropical Medicine.

108

109    To evaluate household heads' understanding and use of antibiotics, the fieldworker used  
110    the "drug bag" method, which comprised of a bag of antibiotics packages and tablets  
111    assembled by the team through visiting formal and informal access points for medicines.<sup>22</sup>  
112    We adapted this method from anthropological studies we have undertaken exploring  
113    medicine use practices in Southern and Eastern Africa.<sup>22</sup> The drug bag was used to facilitate  
114    questions to the household head on which antibiotics they recognised (i.e. had ever seen or  
115    heard about before), whether antibiotics were currently being used in the household, and  
116    more generally about antibiotic use practices in the household (see Supplementary  
117    Material). The drug bag helped to overcome linguistic barriers, as 'antibiotic' is a category of  
118    medicines that is not readily understood in Malawi.

119

120

121

122



## 123 **Statistical Methods**

124 We initially set out to survey 75 households in each of two of the study neighbourhoods  
125 (Chilomoni and Ndirande), and subsequently added the third neighbourhood (Chileka) to  
126 allow comparison with this peri-urban neighbourhood.

127

128 We summarised household, and household head characteristics by study neighbourhood  
129 using counts and percentages, and means and standard deviations, and compared between  
130 groups using Chi-square tests and Fisher's exact tests for categorical data, and Student's T  
131 test for continuous data. We used a p-value threshold of <0.05 to define a statistically-  
132 significant difference between neighbourhoods. Our main study outcomes were antibiotic  
133 use and recognition patterns. To investigate this, we summarised the number of household  
134 members who reported currently using, or having recently used (within the last 6-months)  
135 each antibiotic, and the number of antibiotics recognised by household respondents. To  
136 estimate the percentage of the total study population who used and recognised each  
137 antibiotic, we divided antibiotics within each category by the total numbers of household  
138 members, calculated binomial exact confidence intervals, and compared between study  
139 sites. We constructed a multivariable Poisson regression model to investigate associations  
140 with the number of antibiotics recognised by household respondents. Analysis was  
141 conducted using R v4.1.1 (R Foundation for Statistical Computing, Vienna).

142

143 Data and code to reproduce analysis are available at DOI10.17605/OSF.IO/58EKN

144

145

146 **Results**

147

148 In total, 217 households were interviewed and included in this analysis (Table 1). A total of

149 1051 household members were identified by respondents. Numbers of household residents

150 ranged between 1 and 13, with a median of 5 (interquartile range: 3-6). Numbers of

151 household residents were similar between the three study sites ( $p=0.771$ ).

152

153 **Table 1: Characteristics of households and household respondents, by study site**

154

|                                                               | Chileka<br>(N=74) | Chilomoni<br>(N=67) | Ndirande<br>(N=76) | Total (N=217) | P-value |
|---------------------------------------------------------------|-------------------|---------------------|--------------------|---------------|---------|
| <b>Household residents total (median per household, IQR)</b>  | 355 (4, 3-6)      | 321 (5, 4-6)        | 375 (5, 3-6)       | 1051          | 0.771   |
| <b>Duration residing in site</b>                              |                   |                     |                    |               | 0.213   |
| Less than one year                                            | 2 (2.7%)          | 6 (9.0%)            | 7 (9.2%)           | 15 (6.9%)     |         |
| More than one year                                            | 72 (97.3%)        | 61 (91.0%)          | 69 (90.8%)         | 202 (93.1%)   |         |
| <b>Household respondent male</b>                              | 16 (21.6%)        | 17 (25.4%)          | 10 (13.2%)         | 43 (19.8%)    | 0.167   |
| <b>Household respondent age, Mean (SD)</b>                    | 38 (16)           | 38 (12)             | 37 (13)            | 38 (14)       | 0.657   |
| <b>Household respondent occupation</b>                        |                   |                     |                    |               | < 0.001 |
| Paid domestic worker                                          | 0 (0.0%)          | 3 (4.5%)            | 4 (5.3%)           | 7 (3.2%)      |         |
| Paid employee                                                 | 5 (6.8%)          | 4 (6.0%)            | 4 (5.3%)           | 13 (6.0%)     |         |
| Self employed                                                 | 21 (28.4%)        | 27 (40.3%)          | 30 (39.5%)         | 78 (35.9%)    |         |
| Student                                                       | 1 (1.4%)          | 1 (1.5%)            | 1 (1.3%)           | 3 (1.4%)      |         |
| Unemployed                                                    | 32 (43.2%)        | 31 (46.3%)          | 37 (48.7%)         | 100 (46.1%)   |         |
| Other                                                         | 15 (20.3%)        | 1 (1.5%)            | 0 (0.0%)           | 16 (7.4%)     |         |
| <b>Electricity in dwelling</b>                                | 6 (8.1%)          | 50 (74.6%)          | 58 (76.3%)         | 114 (52.5%)   | < 0.001 |
| <b>Food sufficient to meet needs</b>                          | 38 (51.4%)        | 38 (56.7%)          | 43 (56.6%)         | 119 (54.8%)   | 0.759   |
| <b>Self-rated household poverty</b>                           |                   |                     |                    |               | < 0.001 |
| 1 = poorest in neighbourhood                                  | 8 (10.8%)         | 5 (7.5%)            | 1 (1.3%)           | 14 (6.5%)     |         |
| 2                                                             | 36 (48.6%)        | 19 (28.4%)          | 24 (31.6%)         | 79 (36.4%)    |         |
| 3                                                             | 27 (36.5%)        | 29 (43.3%)          | 45 (59.2%)         | 101 (46.5%)   |         |
| 4                                                             | 3 (4.1%)          | 14 (20.9%)          | 6 (7.9%)           | 23 (10.6%)    |         |
| 5                                                             | 0 (0%)            | 0 (0%)              | 0 (0%)             | 0 (0%)        |         |
| 6 = richest in neighbourhood                                  | 0 (0%)            | 0 (0%)              | 0 (0%)             | 0 (0%)        |         |
| <b>Household respondent highest education level completed</b> |                   |                     |                    |               | 0.044   |
| Missing                                                       | 1                 | 0                   | 0                  | 1             |         |
| Never been to school                                          | 5 (6.8%)          | 3 (4.5%)            | 3 (3.9%)           | 11 (5.1%)     |         |
| Primary                                                       | 43 (58.9%)        | 22 (32.8%)          | 29 (38.2%)         | 94 (43.5%)    |         |
| Secondary completed MSCE                                      | 2 (2.7%)          | 7 (10.4%)           | 8 (10.5%)          | 17 (7.9%)     |         |
| Secondary no MSCE                                             | 22 (30.1%)        | 32 (47.8%)          | 35 (46.1%)         | 89 (41.2%)    |         |
| Higher                                                        | 1 (1.4%)          | 3 (4.5%)            | 1 (1.3%)           | 5 (2.3%)      |         |
| <b>Household respondent literate</b>                          | 58 (78.4%)        | 61 (91.0%)          | 63 (82.9%)         | 182 (83.9%)   | 0.119   |

|                                                             | Chileka<br>(N=74) | Chilomoni<br>(N=67) | Ndirande<br>(N=76) | Total (N=217) | P-value |
|-------------------------------------------------------------|-------------------|---------------------|--------------------|---------------|---------|
| <b>Household respondent self-rated general health</b>       |                   |                     |                    |               | 0.538   |
| Missing                                                     | 1                 | 0                   | 2                  | 3             |         |
| Very poor                                                   | 2 (2.7%)          | 0 (0.0%)            | 0 (0.0%)           | 2 (0.9%)      |         |
| Poor                                                        | 7 (9.6%)          | 5 (7.5%)            | 5 (6.8%)           | 17 (7.9%)     |         |
| Fair                                                        | 20 (27.4%)        | 19 (28.4%)          | 23 (31.1%)         | 62 (29.0%)    |         |
| Good                                                        | 31 (42.5%)        | 27 (40.3%)          | 25 (33.8%)         | 83 (38.8%)    |         |
| Very good                                                   | 13 (17.8%)        | 16 (23.9%)          | 21 (28.4%)         | 50 (23.4%)    |         |
| <b>Household respondent marital status</b>                  |                   |                     |                    |               | 0.307   |
| Divorced                                                    | 4 (5.4%)          | 3 (4.5%)            | 6 (7.9%)           | 13 (6.0%)     |         |
| Living together as if married                               | 0 (0.0%)          | 1 (1.5%)            | 0 (0.0%)           | 1 (0.5%)      |         |
| Married                                                     | 50 (67.6%)        | 49 (73.1%)          | 59 (77.6%)         | 158 (72.8%)   |         |
| Married but not living together                             | 2 (2.7%)          | 0 (0.0%)            | 0 (0.0%)           | 2 (0.9%)      |         |
| Never married                                               | 7 (9.5%)          | 3 (4.5%)            | 3 (3.9%)           | 13 (6.0%)     |         |
| Polygamous marriage                                         | 0 (0.0%)          | 0 (0.0%)            | 2 (2.6%)           | 2 (0.9%)      |         |
| Separated                                                   | 3 (4.1%)          | 2 (3.0%)            | 1 (1.3%)           | 6 (2.8%)      |         |
| Widowed                                                     | 8 (10.8%)         | 9 (13.4%)           | 5 (6.6%)           | 22 (10.1%)    |         |
| <b>Household respondent previously lost spouse to death</b> |                   |                     |                    |               | 0.704   |
| Missing                                                     | 1                 | 1                   | 0                  | 2             |         |
| Yes                                                         | 12 (16.4%)        | 12 (18.2%)          | 10 (13.2%)         | 34 (15.8%)    |         |
| <b>Household respondent ever tested for HIV previously</b>  | 68 (91.9%)        | 64 (95.5%)          | 70 (92.1%)         | 202 (93.1%)   | 0.639   |
| <b>Household respondent HIV status</b>                      |                   |                     |                    |               | 0.131   |
| HIV-negative                                                | 62 (83.8%)        | 57 (85.1%)          | 58 (76.3%)         | 177 (81.6%)   |         |
| HIV-positive                                                | 4 (5.4%)          | 7 (10.4%)           | 13 (17.1%)         | 24 (11.1%)    |         |
| Unknown                                                     | 8 (10.8%)         | 3 (4.5%)            | 5 (6.6%)           | 16 (7.4%)     |         |
| <b>Household respondent taking ART (if HIV-positive)</b>    | 4 (100%)          | 7 (100%)            | 13 (100%)          | 24 (100%)     | 1.000   |

155

156 The majority of household respondents were female (80.2%), and the mean respondent age

157 was 38 years. Household and household respondent characteristics were similar in

158 Chilomoni and Ndirande, but there were substantial differences between these

159 neighbourhoods and Chileka. Whereas in Ndirande (76.3%) and Chilomoni (74.6%) most

160 households had electricity supplied to the dwelling, in Chileka only 8.1% had electricity

161 (p<0.001). 78.4% of household respondents in Chileka reported that they were literate,

162 compared to 91.0% in Chilomoni and 82.9% in Ndirande (p=0.119). Reported coverage of

163 HIV testing was very high and similar across neighbourhoods, with 93.1% of household

164 respondents reporting having ever previously tested for HIV ( $p=0.639$  for comparison  
165 between sites). Self-reported HIV-positive status was 11.1% overall, and was substantially  
166 (but not statistically significantly) lower in Chileka (5.4%) compared to Chilomoni (10.4%)  
167 and Ndirande (17.1%),  $p=0.131$ . Antiretroviral therapy coverage was 100% among HIV-  
168 positive respondents across all three sites.

169

### 170 **Antibiotic recognition**

171 Using the drug bag method, household respondents recognised a median of five antibiotics  
172 (IQR: 3-6). The median number of antibiotics recognised in Chileka (4, IQR: 3-6) was slightly  
173 lower than in Chilomoni (5, IQR:3-6) or Ndirande (5, IQR: 4-6.25), but this was not  
174 statistically significant ( $p=0.1176$ ). The most common antibiotics recognised overall by  
175 household respondents were: amoxicillin tablets (202/217, 93.1%, 95% CI: 88.9-96.1%);  
176 cotrimoxazole tablets (184/217, 84.8%, 95% CI: 79.3-89.3%); and amoxicillin suspension  
177 (94/217, 43.3%, 95% CI: 36.6-50.2%). Patterns of antibiotic recognition were broadly similar  
178 between the three study sites (Figure 2).

179 **Figure 2: Household respondent antibiotic recognition, by study site**

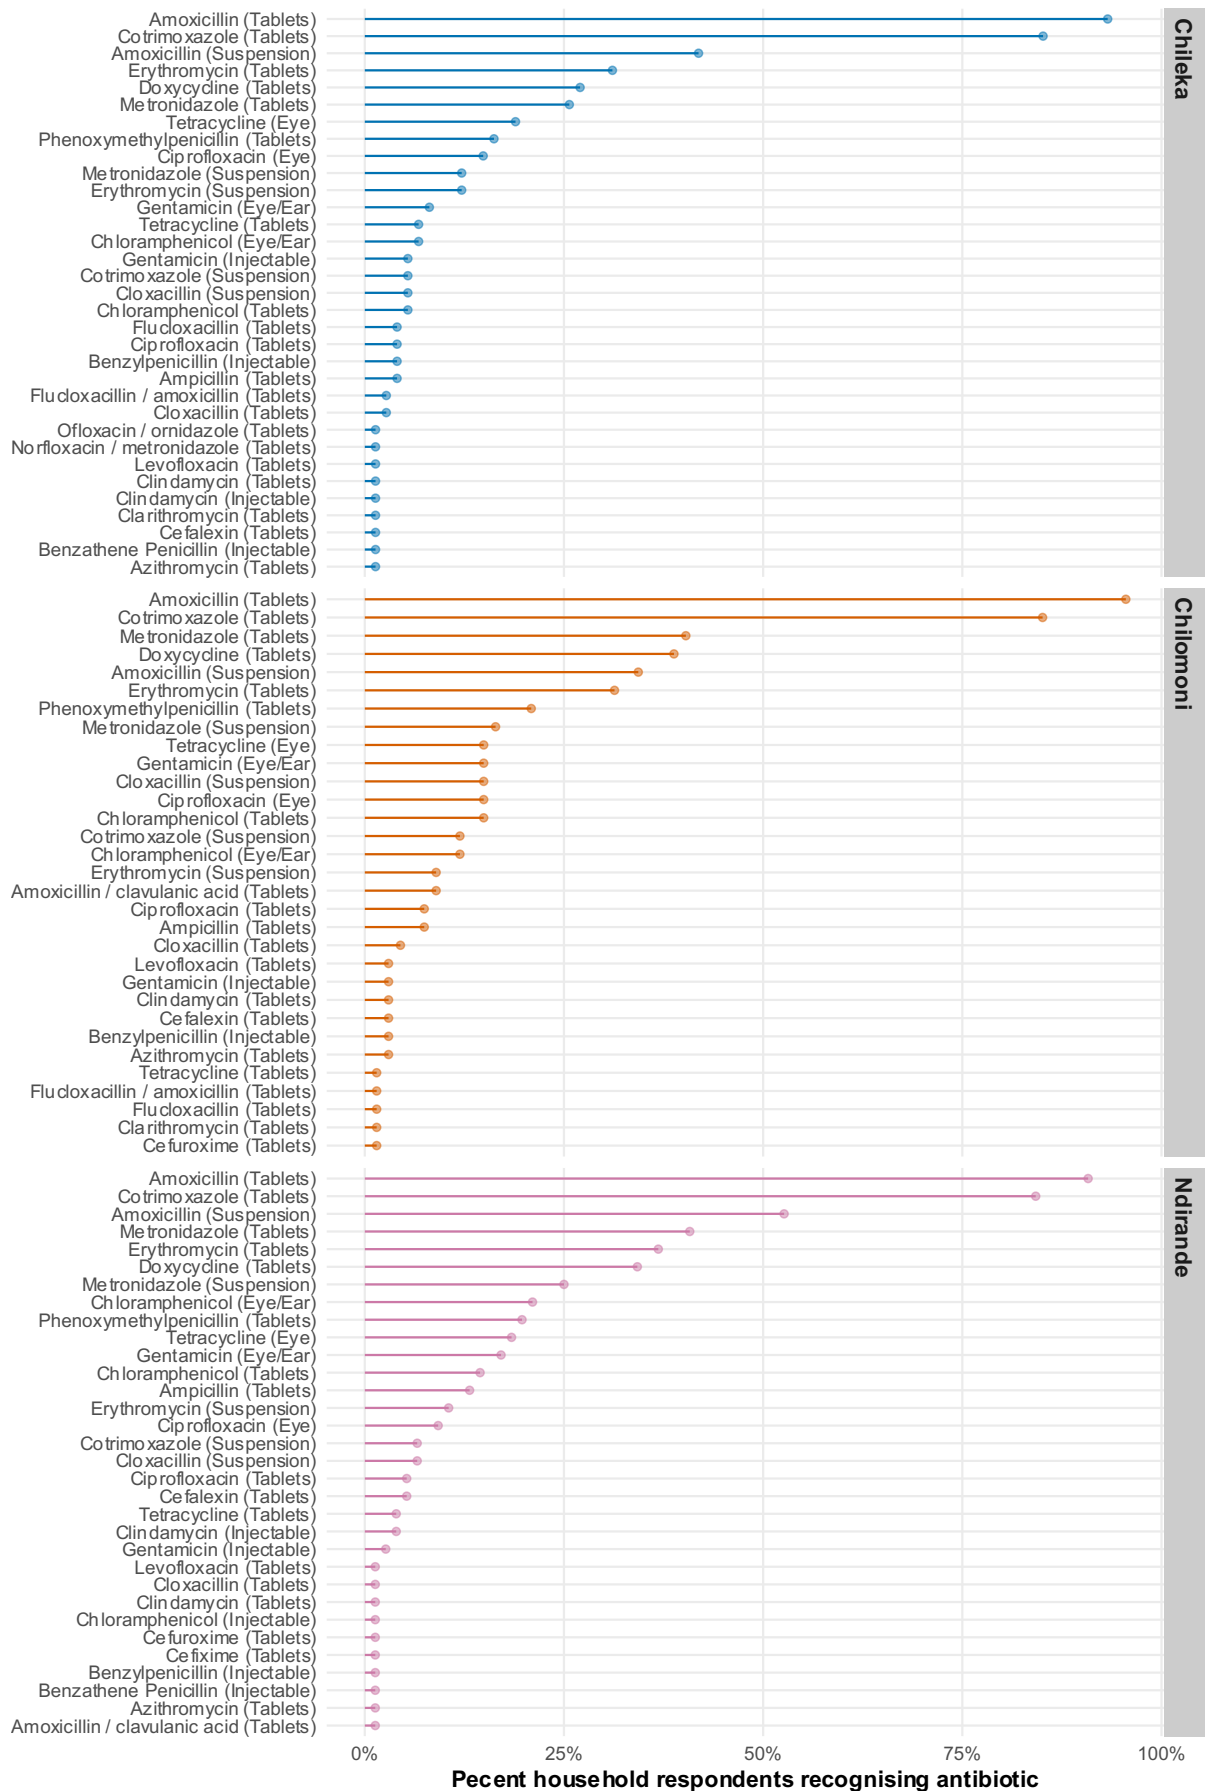

181

182 **Associations with recognition of antibiotics**

183 In univariable regression analysis, household respondents from Ndirande (relative risk [RR]:  
184 1.18, 95% CI: 1.02-1.36, compared to Chileka), and from larger households (RR: 1.03, 95% CI:  
185 1.00-1.06 per person increase in household size) recognised a significantly greater number  
186 of antibiotics (Table 2). Respondents with unknown HIV status (RR: 0.76, 95% CI: 0.58-0.98)  
187 and male household respondents recognised significantly fewer antibiotics than women  
188 (0.88, 95% CI: 0.75-1.03) although this was not statistically significant. In multivariable  
189 regression, male sex (RR: 0.83, 95% CI: 0.69-0.99) and having unknown HIV status (RR: 0.76,  
190 95% CI: 0.57-0.99) were significantly associated with recognition of fewer antibiotics.

191

192 **Table 2: Associations with number of antibiotics recognised by household respondent**

193

| Variable                            | Univariate relative risk | 95% confidence interval | Multivariable relative risk | 95% confidence interval |
|-------------------------------------|--------------------------|-------------------------|-----------------------------|-------------------------|
| Site                                |                          |                         |                             |                         |
| Chileka                             | Ref                      |                         | Ref                         |                         |
| Chilomoni                           | 1.15                     | 0.99-1.34               | 1.10                        | 0.94-1.28               |
| Ndirande                            | 1.18                     | 1.02-1.36               | 1.09                        | 0.94-1.27               |
| Respondent sex                      |                          |                         |                             |                         |
| Female                              | Ref                      |                         | Ref                         |                         |
| Male                                | 0.88                     | 0.75-1.03               | 0.83                        | 0.69-0.99               |
| Respondent age (per year)           | 1.00                     | 1.00-1.01               | 1.00                        | 1.00-1.01               |
| Household self-rated poverty status |                          |                         |                             |                         |
| Very poor                           | Ref                      |                         | Ref                         |                         |
| Poor                                | 0.97                     | 0.75-1.28               | 0.99                        | 0.76-1.31               |
| Somewhat poor                       | 1.22                     | 0.95-1.59               | 1.22                        | 0.94-1.61               |
| Somewhat rich                       | 1.12                     | 0.83-1.53               | 1.17                        | 0.85-1.62               |
| Respondent HIV status               |                          |                         |                             |                         |
| HIV-negative                        | Ref                      |                         | Ref                         |                         |
| HIV-positive                        | 1.11                     | 0.92-1.32               | 1.03                        | 0.85-1.25               |
| HIV status unknown                  | 0.76                     | 0.58-0.98               | 0.76                        | 0.57-0.99               |
| Number of household members         | 1.03                     | 1.00-1.06               | 1.02                        | 0.99-1.05               |
| Respondent literacy                 |                          |                         |                             |                         |
| Respondent illiterate               | Ref                      |                         | Ref                         |                         |
| Respondent literate                 | 1.10                     | 0.93-1.30               | 1.01                        | 0.85-1.22               |

194

195

196

197 **Antibiotic use**

198 Of the 1051 household members, a total of 67 (6.4%, 95% CI: 5.0-8.0%) were reportedly  
199 currently taking one of the antibiotics identified within the drug bag (Table 3). The bag  
200 included multiple versions of the same antibiotics (active ingredients) to facilitate  
201 recognition. Estimates of household members' current antibiotic use were similar between  
202 Chileka (22/355, 6.2%, 95% CI: 3.9-9.2%), Chilomoni (20/321, 6.3%, 95% CI: 3.8-9.5%), and  
203 Ndirande (25/375, 6.7%, 4.4-9.7%). Only five antibiotics (counted by active ingredient) were  
204 identified as being currently taken by household members (Table 2). The antibiotic  
205 formulation most commonly reported as currently used was cotrimoxazole tablets  
206 (39/1051, 3.7%, 95% CI: 2.7-5.0%), followed by amoxicillin tablets (13/1051, 1.2%, 95% CI:  
207 0.7-2.1%), erythromycin tablets (5/1051, 0.5%, 95% CI: 0.2-1.1%) and amoxicillin suspension  
208 (5/1051, 0.5%, 95% CI: 0.2-1.1%).

209 **Table 3: Antibiotic use by household members**

210

| Antibiotic                            | Chileka (N=355)<br>n (% , 95%CI) | Chilomoni (N=321)<br>n (% , 95%CI) | Ndirande (N=375)<br>n (% , 95%CI) |
|---------------------------------------|----------------------------------|------------------------------------|-----------------------------------|
| <b>Current use</b>                    |                                  |                                    |                                   |
| Amoxicillin (Suspension)              | 1 (0.3%, 0.0%-1.6%)              | 1 (0.3%, 0.0%-1.7%)                | 3 (0.8%, 0.2%-2.3%)               |
| Amoxicillin (Tablets)                 | 4 (1.1%, 0.3%-2.9%)              | 5 (1.6%, 0.5%-3.6%)                | 4 (1.1%, 0.3%-2.7%)               |
| Chloramphenicol (Tablets)             |                                  | 1 (0.3%, 0.0%-1.7%)                |                                   |
| Cotrimoxazole (Tablets)               | 13 (3.7%, 2.0%-6.2%)             | 10 (3.1%, 1.5%-5.7%)               | 16 (4.3%, 2.5%-6.8%)              |
| Doxycycline (Tablets)                 | 1 (0.3%, 0.0%-1.6%)              | 1 (0.3%, 0.0%-1.7%)                |                                   |
| Erythromycin (Suspension)             |                                  |                                    | 2 (0.5%, 0.1%-1.9%)               |
| Erythromycin (Tablets)                | 3 (0.8%, 0.2%-2.4%)              | 2 (0.6%, 0.1%-2.2%)                |                                   |
| <b>Used last 6 months</b>             |                                  |                                    |                                   |
| Amoxicillin (Suspension)              | 11 (3.1%, 1.6%-5.5%)             | 7 (2.2%, 0.9%-4.4%)                | 20 (5.3%, 3.3%-8.1%)              |
| Amoxicillin (Tablets)                 | 44 (12.4%, 9.2%-16.3%)           | 39 (12.1%, 8.8%-16.2%)             | 43 (11.5%, 8.4%-15.1%)            |
| Amoxicillin/clavulanic acid (Tablets) |                                  | 2 (0.6%, 0.1%-2.2%)                |                                   |
| Ampicillin (Tablets)                  |                                  |                                    | 2 (0.5%, 0.1%-1.9%)               |
| Benzathine Penicillin (Injectable)    | 1 (0.3%, 0.0%-1.6%)              |                                    |                                   |
| Benzylpenicillin (Injectable)         |                                  | 1 (0.3%, 0.0%-1.7%)                | 1 (0.3%, 0.0%-1.5%)               |
| Cefalexin (Tablets)                   |                                  | 1 (0.3%, 0.0%-1.7%)                | 1 (0.3%, 0.0%-1.5%)               |
| Chloramphenicol (Eye/Ear)             | 1 (0.3%, 0.0%-1.6%)              | 2 (0.6%, 0.1%-2.2%)                | 4 (1.1%, 0.3%-2.7%)               |
| Chloramphenicol (Tablets)             |                                  | 2 (0.6%, 0.1%-2.2%)                | 2 (0.5%, 0.1%-1.9%)               |
| Ciprofloxacin (Eye)                   | 2 (0.6%, 0.1%-2.0%)              | 3 (0.9%, 0.2%-2.7%)                | 1 (0.3%, 0.0%-1.5%)               |
| Ciprofloxacin (Tablets)               | 2 (0.6%, 0.1%-2.0%)              | 1 (0.3%, 0.0%-1.7%)                | 1 (0.3%, 0.0%-1.5%)               |
| Clindamycin (Injectable)              |                                  |                                    | 1 (0.3%, 0.0%-1.5%)               |
| Cloxacillin (Suspension)              | 1 (0.3%, 0.0%-1.6%)              |                                    |                                   |
| Cloxacillin (Tablets)                 | 1 (0.3%, 0.0%-1.6%)              |                                    |                                   |
| Cotrimoxazole (Suspension)            | 1 (0.3%, 0.0%-1.6%)              | 1 (0.3%, 0.0%-1.7%)                | 1 (0.3%, 0.0%-1.5%)               |
| Cotrimoxazole (Tablets)               | 47 (13.2%, 9.9%-17.2%)           | 30 (9.3%, 6.4%-13.1%)              | 39 (10.4%, 7.5%-13.9%)            |
| Doxycycline (Tablets)                 | 6 (1.7%, 0.6%-3.6%)              | 7 (2.2%, 0.9%-4.4%)                | 12 (3.2%, 1.7%-5.5%)              |
| Erythromycin (Suspension)             | 3 (0.8%, 0.2%-2.4%)              |                                    | 1 (0.3%, 0.0%-1.5%)               |
| Erythromycin (Tablets)                | 9 (2.5%, 1.2%-4.8%)              | 11 (3.4%, 1.7%-6.0%)               | 8 (2.1%, 0.9%-4.2%)               |
| Gentamicin (Injectable)               |                                  | 1 (0.3%, 0.0%-1.7%)                |                                   |
| Gentamicin (Eye/Ear)                  | 1 (0.3%, 0.0%-1.6%)              | 3 (0.9%, 0.2%-2.7%)                | 4 (1.1%, 0.3%-2.7%)               |
| Levofloxacin (Tablets)                |                                  | 1 (0.3%, 0.0%-1.7%)                |                                   |
| Metronidazole (Suspension)            | 4 (1.1%, 0.3%-2.9%)              | 3 (0.9%, 0.2%-2.7%)                | 7 (1.9%, 0.8%-3.8%)               |
| Metronidazole (Tablets)               | 9 (2.5%, 1.2%-4.8%)              | 9 (2.8%, 1.3%-5.3%)                | 13 (3.5%, 1.9%-5.9%)              |
| Phenoxymethylpenicillin (Tablets)     | 1 (0.3%, 0.0%-1.6%)              | 1 (0.3%, 0.0%-1.7%)                | 3 (0.8%, 0.2%-2.3%)               |
| Tetracycline (Eye)                    | 1 (0.3%, 0.0%-1.6%)              | 2 (0.6%, 0.1%-2.2%)                | 4 (1.1%, 0.3%-2.7%)               |

211

Denominators are all reported household members, by site. Binomial exact 95% confidence intervals.

212

Where cells are blank, household heads reported no use/use in last 6-months of this antibiotic by household members.

213

214 Household respondents reported that 440 of the 1051 household members (41.9%) had

215 taken an antibiotic in the last 6-months. The antibiotic formulations that had been

216 reportedly most frequently taken in the preceding 6-months were: amoxicillin tablets

217 (126/1051, 12.0%, 95% CI: 10.1%-14.1%); cotrimoxazole tablets (116/1051, 11.0%, 95%CI:

218 9.2-13.1%); and amoxicillin suspension (38/1051, 3.6%, 95% CI: 2.6-4.9%). Patterns of

219 reported antibiotic use in the preceding 6-months were broadly similar between the three

220 study sites.



## 221 Discussion

222

223 The main findings of this detailed cross-sectional survey of community antibiotic use  
224 practices in Blantyre Malawi were that current antibiotic use was (67/1051, 6.4%) and  
225 recent use (last 6 months) was (440/1051, 41.9%). Both current and recent antibiotic use  
226 were limited to a small number of antibiotic formulations, with amoxicillin and  
227 cotrimoxazole being the most frequently recognised and used. Both antibiotics are classified  
228 as “access” on the WHO’s Access, Watch, Reserve (AWaRe) list, meaning they are commonly  
229 used to treat infections and should be clinically available at all times<sup>23</sup>. In contexts such as  
230 Malawi, cotrimoxazole is commonly used for chemoprophylaxis for people living with HIV,  
231 and with HIV prevalence in the study populations being high, it is not surprising that this was  
232 one of the most commonly used and recognised antibiotic. In contrast, the number of  
233 antibiotics recognised was significantly lower among people less likely to access formal  
234 health services (such as people with unknown HIV status, a strong indicator of delayed  
235 healthcare seeking and poor access where testing is widely available), and men, who  
236 frequently do not participate in care-seeking activities for families.

237

238 Taken together, these findings suggest that, contrary to popular narratives, use of a wide  
239 range of antibiotics and antibiotics on the watch or reserve lists was not widespread in  
240 these urban and periurban African settings; rather access to a wide range of antibiotics is  
241 likely to be limited for the majority of the population, and potentially not a major  
242 contributor to so-called “antibiotic overuse”. Nevertheless, antibiotics such as  
243 cotrimoxazole, amoxicillin, and erythromycin have broad spectrum action, and dependence  
244 on these antibiotics for community management of illness is associated with generation of  
245 resistance. Therefore, ABU and AMR guidance must recognise the healthcare and

246 sociological context within which recommendations are made; improvements in universal  
247 healthcare access (including treatment of infection) should be accompanied by high quality  
248 surveillance and antibiotic use data, supported by interrogation of social narratives around  
249 the determinants of antibiotic use.

250

251 In Malawi and similar settings in Southern and Eastern African countries, primary health  
252 care facilities are an important source of community care, with services provided free,<sup>24</sup> but  
253 delivered under severe resource constraints with high rates of stockouts of many essential  
254 medicines.<sup>25,26</sup> International donor programmes play a significant role in funding services,  
255 and infectious diseases have received comparably more resources.<sup>27</sup> The provision of  
256 cotrimoxazole by the HIV programme at primary care clinics may explain why it is well  
257 recognised and used within households.<sup>25</sup> A multi-site study exploring household antibiotic  
258 use in Zimbabwe, Malawi and Uganda identified differences in the profile of ABU, with  
259 cotrimoxazole being the most frequently used in rural Malawi, amoxicillin in Harare,  
260 Zimbabwe, and metronidazole within informal settlements in Uganda.<sup>28</sup> Most differences in  
261 use reflected differences in the configuration of the health system and antibiotic supplies.

262

263 In Malawi, gender power relations shape household care seeking practices, with men often  
264 presenting at health care facilities critically ill, and having delayed diagnosis of diseases of  
265 major public health importance, particularly HIV and tuberculosis.<sup>29</sup> Women spend  
266 considerably more time than men seeking care and supporting household members to seek  
267 care.<sup>30</sup> These factors are likely to explain why women had better recognition and use of  
268 antibiotics. While government health care facilities provide care without user fees, care  
269 seeking incurs costs for transportation and loss of time from other livelihood activities.<sup>31</sup>

270 Improving access and removing economic barriers to care seeking, are likely to be important  
271 interventions to improve the community management of febrile illness, both to improve  
272 recognition of severe illness requiring antibiotics with referral to hospital where required,  
273 and to restrict unnecessary ABU.

274

275 Global public engagement campaigns to improve awareness of antimicrobial resistance have  
276 focused predominantly on communicating the need to stop people from indiscriminately  
277 using antibiotics with insufficient attention paid to the issues of access.<sup>32</sup> Our findings  
278 demonstrate frequent use of a very limited number of antibiotic formulations in the  
279 preceding six months, however in a context where febrile illness is common and  
280 presentation to health care facilities is late, and diagnostics are few, this may represent  
281 appropriate prescribing. Indeed, this may instead speak to the need to improve access to  
282 and quality of health care services, not limit access, particularly for the most economically  
283 disadvantaged groups.

284

285 The limitations of this study include the potential for social desirability bias, whereby  
286 household respondents may state that they recognised or used antibiotics to meet  
287 interviewer’s expectations. We mitigated against this by using our innovative and previously  
288 validated “drug bag” methodology and experienced field interviewers. The drug bag uses a  
289 wide range of antibiotics available in the community; however it is possible that we did not  
290 include some important formulations, or that packaging designs have changed, limiting  
291 recognition. The concept of an “antibiotic” is not well understood in Malawi and has no  
292 specific Chichewa word, potentially hindering accurate recall of use and recognition. We  
293 randomly sampled households from a community sampling frame to minimise sampling

294 bias; nevertheless, women were over-represented, perhaps because men may not have  
295 been available for interview, or at work. We may therefore have underestimated antibiotic  
296 use and recognition.

297

298 In conclusion, we found patterns of current and recent antibiotic use and recognition among  
299 randomly-sampled household members in Blantyre, Malawi to be limited to a small number  
300 of broad-spectrum antibiotic formulations. People known to have poorer access to  
301 healthcare reported recognising fewer antibiotics. So-called “antibiotic overuse” –  
302 specifically of antibiotics on the watch list – is unlikely to be a major driver of antimicrobial  
303 resistance and drug resistance infections in this and similar settings. Rapidly reducing  
304 generation of antibiotic resistance and drug resistant infection in low-income settings in  
305 Africa will require a shift of focus, away from narratives that blame people in precarious  
306 living conditions for “antibiotic overuse” and instead towards holistic approaches that  
307 address the underlying systemic drivers of AMR, whilst recognising and supporting antibiotic  
308 access within well-functioning health systems.

309

310

### 311 **Acknowledgements**

312 We are grateful to all study participants who took part in this study and to the DRUM  
313 Consortium.

314

### 315 **Funding**

316 This study was funded by AMR Cross-Council Initiative through a grant from the Medical  
317 Research Council MR/S004793/1. MLW is funded by Wellcome Asia and Africa Programme  
318 Grant 206545/Z/17/Z. PM is funded by Wellcome (206575/Z/17/Z). For the purpose of open  
319 access, the author has applied a CC BY public copyright licence to any Author Accepted  
320 Manuscript version arising from this submission.

321

## 322 References

323

- 324 1. WHO,. New report calls for urgent action to avert antimicrobial resistance crisis. World  
325 Health Organization. Published 2019. Accessed July 27, 2021.  
326 [https://www.who.int/news/item/29-04-2019-new-report-calls-for-urgent-action-to-](https://www.who.int/news/item/29-04-2019-new-report-calls-for-urgent-action-to-avert-antimicrobial-resistance-crisis)  
327 [avert-antimicrobial-resistance-crisis](https://www.who.int/news/item/29-04-2019-new-report-calls-for-urgent-action-to-avert-antimicrobial-resistance-crisis)
- 328 2. WHO,. *WHO: Global Action Plan on Antimicrobial Resistance*. World Health  
329 Organization; 2015. Accessed August 11, 2020. [http://www.who.int/antimicrobial-](http://www.who.int/antimicrobial-resistance/publications/global-action-plan/en/)  
330 [resistance/publications/global-action-plan/en/](http://www.who.int/antimicrobial-resistance/publications/global-action-plan/en/)
- 331 3. Cox JA, Vlieghe E, Mendelson M, Wertheim H, Ndegwa L, Villegas MV, Gould I, Levy Hara  
332 G. Antibiotic stewardship in low- and middle-income countries: the same but different?  
333 *Clinical Microbiology and Infection*. 2017;23(11):812-818. doi:10.1016/j.cmi.2017.07.010
- 334 4. Jasovský D, Littmann J, Zorzet A, Cars O. Antimicrobial resistance—a threat to the  
335 world’s sustainable development. *Upsala Journal of Medical Sciences*. 2016;121(3):159-  
336 164. doi:10.1080/03009734.2016.1195900
- 337 5. Laxminarayan R, Duse A, Wattal C, Zaidi AKM, Wertheim HFL, Sumpradit N, Vlieghe E,  
338 Hara GL, Gould IM, Goossens H, Greko C, So AD, Bigdeli M, Tomson G, Woodhouse W,  
339 Ombaka E, Peralta AQ, Qamar FN, Mir F, Kariuki S, Bhutta ZA, Coates A, Bergstrom R,  
340 Wright GD, Brown ED, Cars O. Antibiotic resistance—the need for global solutions. *Lancet*  
341 *Infect Dis*. 2013;13(12):1057-1098. doi:10.1016/S1473-3099(13)70318-9
- 342 6. Iskandar K, Molinier L, Hallit S, Sartelli M, Hardcastle TC, Haque M, Lugova H, Dhingra S,  
343 Sharma P, Islam S. Surveillance of antimicrobial resistance in low-and middle-income  
344 countries: a scattered picture. *Antimicrobial Resistance & Infection Control*.  
345 2021;10(1):1-19.
- 346 7. Klein EY, Van Boeckel TP, Martinez EM, Pant S, Gandra S, Levin SA, Goossens H,  
347 Laxminarayan R. Global increase and geographic convergence in antibiotic consumption  
348 between 2000 and 2015. *Proceedings of the National Academy of Sciences*.  
349 2018;115(15):E3463-E3470.
- 350 8. Van Boeckel TP, Gandra S, Ashok A, Caudron Q, Grenfell BT, Levin SA, Laxminarayan R.  
351 Global antibiotic consumption 2000 to 2010: an analysis of national pharmaceutical  
352 sales data. *The Lancet infectious diseases*. 2014;14(8):742-750.
- 353 9. WHO,. Antibiotic resistance: Key facts. World Health Organization. Published 2020.  
354 Accessed June 24, 2020. [https://www.who.int/news-room/fact-sheets/detail/antibiotic-](https://www.who.int/news-room/fact-sheets/detail/antibiotic-resistance)  
355 [resistance](https://www.who.int/news-room/fact-sheets/detail/antibiotic-resistance)
- 356 10. Sartelli M, C Hardcastle T, Catena F, Chichom-Mefire A, Coccolini F, Dhingra S, Haque M,  
357 Hodonou A, Iskandar K, Labricciosa FM. Antibiotic use in low and middle-income  
358 countries and the challenges of antimicrobial resistance in surgery. *Antibiotics*.  
359 2020;9(8):497.

- 360 11. Wilkinson A, Ebata A, MacGregor H. Interventions to Reduce Antibiotic Prescribing in  
361 LMICs: A Scoping Review of Evidence from Human and Animal Health Systems.  
362 *Antibiotics*. 2018;8(1):2. doi:10.3390/antibiotics8010002
- 363 12. Yeika EV, Ingelbeen B, Kemah B, Wirsiy FS, Fomengia JN, Van der Sande MA.  
364 Comparative assessment of the prevalence, practices and factors associated with self-  
365 medication with antibiotics in Africa. *Tropical Medicine & International Health*.  
366 2021;26(8):862-881.
- 367 13. Torres N, Chibi B, Middleton L, Solomon V, Mashamba-Thompson T. Evidence of factors  
368 influencing self-medication with antibiotics in low and middle-income countries: a  
369 systematic scoping review. *Public health*. 2019;168:92-101.
- 370 14. Do NT, Vu HT, Nguyen CT, Punpuing S, Khan WA, Gyapong M, Asante KP, Munguambe K,  
371 Gómez-Olivé FX, John-Langba J. Community-based antibiotic access and use in six low-  
372 income and middle-income countries: a mixed-method approach. *The Lancet Global  
373 Health*. 2021;9(5):e610-e619.
- 374 15. Hamers RL, van Doorn HR. Antibiotic consumption in low-income and middle-income  
375 countries. *The Lancet Global Health*. 2018;6(7):e732.
- 376 16. Sulis G, Adam P, Nafade V, Gore G, Daniels B, Daftary A, Das J, Gandra S, Pai M.  
377 Antibiotic prescription practices in primary care in low- and middle-income countries: A  
378 systematic review and meta-analysis. Kruk ME, ed. *PLoS Med*. 2020;17(6):e1003139.  
379 doi:10.1371/journal.pmed.1003139
- 380 17. Allwell-Brown G, Hussain-Alkhateeb L, Sewe MO, Kitutu FE, Strömdahl S, Mårtensson A,  
381 Johansson EW. Determinants of trends in reported antibiotic use among sick children  
382 under five years of age across low-income and middle-income countries in 2005-17: a  
383 systematic analysis of user characteristics based on 132 national surveys from 73  
384 countries. *International Journal of Infectious Diseases*. Published online 2021.
- 385 18. Frost I, Kapoor G, Craig J, Liu D, Laxminarayan R. Status, challenges and gaps in  
386 antimicrobial resistance surveillance around the world. *Journal of Global Antimicrobial  
387 Resistance*. Published online 2021.
- 388 19. Kirchhelle C, Atkinson P, Broom A, Chuengsatiansup K, Ferreira JP, Fortané N, Frost I,  
389 Gradmann C, Hinchliffe S, Hoffman SJ, Lezaun J, Nayiga S, Outtersson K, Podolsky SH,  
390 Raymond S, Roberts AP, Singer AC, So AD, Sringernyuan L, Tayler E, Rogers Van Katwyk  
391 S, Chandler CIR. Setting the standard: multidisciplinary hallmarks for structural,  
392 equitable and tracked antibiotic policy. *BMJ Glob Health*. 2020;5(9):e003091.  
393 doi:10.1136/bmjgh-2020-003091
- 394 20. National Statistics Office. 2018 Malawi Population and Housing Census. Accessed  
395 September 22, 2021.  
396 [http://www.nsomalawi.mw/index.php%3Foption%3Dcom\\_content%26view%3Darticle%26id%3D226:2018-malawi-population-and-housing-census%26catid%2E%80%89%3D%2E%80%898:reports%26Itemid%2E%80%89%3D%2E%80%896](http://www.nsomalawi.mw/index.php%3Foption%3Dcom_content%26view%3Darticle%26id%3D226:2018-malawi-population-and-housing-census%26catid%2E%80%89%3D%2E%80%898:reports%26Itemid%2E%80%89%3D%2E%80%896)

- 400 21. Ministry of Health of Malawi. Malawi Population-based HIV Impact Assessment 2015-  
401 2016. Published online 2018.
- 402 22. Dixon J, MacPherson E, Manyau S, Nayiga S, Khine Zaw Y, Kayendeke M, Nabirye C,  
403 Denyer Willis L, de Lima Hutchison C, Chandler CI. The 'Drug Bag' method: lessons from  
404 anthropological studies of antibiotic use in Africa and South-East Asia. *Global health*  
405 *action*. 2019;12(sup1):1639388.
- 406 23. WHO,. WHO | WHO releases the 2019 AWaRe Classification Antibiotics. WHO. Published  
407 2019. Accessed November 19, 2020.  
408 [http://www.who.int/medicines/news/2019/WHO\\_releases2019AWaRe\\_classification\\_a](http://www.who.int/medicines/news/2019/WHO_releases2019AWaRe_classification_antibiotics/en/)  
409 [ntibiotics/en/](http://www.who.int/medicines/news/2019/WHO_releases2019AWaRe_classification_antibiotics/en/)
- 410 24. Makwero MT. Delivery of primary health care in Malawi. *Afr j prim health care fam med*.  
411 2018;10(1). doi:10.4102/phcfm.v10i1.1799
- 412 25. MacPherson EE, Reynolds J, Sanudi E, Nkaombe A, Phiri C, Mankhomwa J, Dixon J,  
413 Chandler CIR. Understanding antimicrobial resistance through the lens of antibiotic  
414 vulnerabilities in primary health care in rural Malawi. *Global Public Health*. Published  
415 online December 21, 2021:1-17. doi:10.1080/17441692.2021.2015615
- 416 26. Wild L, Cammack D. The supply and distribution of essential medicines in Malawi.  
417 Published online 2013.
- 418 27. Page S. The Development Aid Situation in Malawi. In: *Development, Sexual Cultural*  
419 *Practices and HIV/AIDS in Africa*. Springer; 2019:43-60.
- 420 28. Dixon J, MacPherson EE, Nayiga, S, Manyau S, Nabirye C, Kayendeke M, Sanudi E,  
421 Nkoambe, A, Mareke, P, Sithole, K, de Lima Hutchison C, Bradley, J, Yeung S, Ferrand R,  
422 Lal S, Roberts C, Green, E, Denyer Willis, Laurie, Staedke, S, Chandler CIR. A Mixed-  
423 Methods, Multi-Country Analysis of Household Antibiotic use in Malawi, Uganda and  
424 Zimbabwe. *BMJ Global Health*. 2021;6(e006920).
- 425 29. Chikovore J, Hart G, Kumwenda M, Chipungu GA, Corbett L. 'For a mere cough, men  
426 must just chew Conjex, gain strength, and continue working': the provider construction  
427 and tuberculosis care-seeking implications in Blantyre, Malawi. *Global Health Action*.  
428 2015;8(1):26292. doi:10.3402/gha.v8.26292
- 429 30. Yeatman S, Chamberlin S, Dovel K. Women's (health) work: a population-based, cross-  
430 sectional study of gender differences in time spent seeking health care in Malawi. *PLoS*  
431 *One*. 2018;13(12):e0209586.
- 432 31. Abihiro GA, Grace, MB, De Allegri M. Gaps in universal health coverage in Malawi: A  
433 qualitative study in rural communities. *BMC Health Serv Res*. 2014;14(1):234.  
434 doi:10.1186/1472-6963-14-234
- 435 32. Glover R, Chandler C, Manton J. The benefits and risks of public awareness campaigns:  
436 World Antibiotic Awareness Week in context. *The BMJ Opinion*. Published online 2019.
